# Supplementary material for: Thermographic Image of the Hoof Print in Leisure and Cross-Country Warmblood Horses: A Pilot Study
Source: MDPI journal article supplement (doi:10.3390/vetsci10070470), 2023-07-18
Supplement: s1 [file s1]

| Number | Breed                            | Performance type | Age | Weight | Height | Lameness Score                            |
|--------|----------------------------------|------------------|-----|--------|--------|-------------------------------------------|
| 1      | Warmblood – Romanian Sport Horse | Leisure          | 12  | 564    | 162    | Negative reaction to lameness examination |
| 2      | Warmblood – Romanian Sport Horse | Leisure          | 4   | 512    | 154    | Negative reaction to lameness examination |
| 3      | Warmblood – Romanian Sport Horse | Leisure          | 16  | 550    | 158    | Score 2                                   |
| 4      | Warmblood – Romanian Sport Horse | Leisure          | 7   | 517    | 155    | Negative reaction to lameness examination |
| 5      | Warmblood – Romanian Sport Horse | Leisure          | 7   | 544    | 161    | Negative reaction to lameness examination |
| 6      | Warmblood-Lipizzaner             | Leisure          | 9   | 615    | 165    | Negative reaction to lameness examination |
| 7      | Warmblood-Oldenburg              | Leisure          | 11  | 587    | 164    | Score 2                                   |
| 8      | Warmblood-Lipizzaner             | Leisure          | 8   | 540    | 160    | Negative reaction to lameness examination |
| 9      | Warmblood-Lipizzaner             | Leisure          | 10  | 532    | 158    | Negative reaction to lameness examination |
| 10     | Warmblood – Romanian Sport Horse | Leisure          | 11  | 514    | 156    | Score 1                                   |
| 11     | Warmblood-Oldenburg              | Leisure          | 8   | 525    | 168    | Negative reaction to lameness examination |
| 12     | Warmblood-Lipizzaner             | Leisure          | 8   | 514    | 162    | Negative reaction to lameness examination |
| 13     | Warmblood – Romanian Sport Horse | Leisure          | 6   | 517    | 159    | Score 2                                   |
| 14     | Warmblood-Oldenburg              | Leisure          | 11  | 572    | 160    | Negative reaction to lameness examination |
| 15     | Warmblood – Romanian Sport Horse | Leisure          | 12  | 557    | 160    | Score 1                                   |
| 16     | Warmblood-Oldenburg              | Leisure          | 8   | 578    | 164    | Negative reaction to lameness examination |
| 17     | Warmblood-Lipizzaner             | Leisure          | 7   | 580    | 158    | Negative reaction to lameness examination |
| 18     | Warmblood-Lipizzaner             | Leisure          | 7   | 584    | 161    | Score 2                                   |
| 19     | Warmblood-Lipizzaner             | Leisure          | 8   | 567    | 154    | Score 2                                   |
| 20     | Warmblood – Romanian Sport Horse | Leisure          | 6   | 532    | 155    | Negative reaction to lameness examination |
| 21     | Warmblood – Romanian Sport Horse | Leisure          | 7   | 542    | 158    | Negative reaction to lameness examination |
| 22     | Warmblood-Oldenburg              | Leisure          | 7   | 595    | 160    | Negative reaction to lameness examination |
| 23     | Warmblood-Oldenburg              | Leisure          | 5   | 570    | 164    | Negative reaction to lameness examination |

|    |                                  |         |    |     |     |                                           |
|----|----------------------------------|---------|----|-----|-----|-------------------------------------------|
| 24 | Warmblood-Oldenburg              | Leisure | 6  | 547 | 158 | Score 1                                   |
| 25 | Warmblood – Romanian Sport Horse | Leisure | 4  | 526 | 148 | Negative reaction to lameness examination |
| 26 | Warmblood – Romanian Sport Horse | Leisure | 8  | 515 | 162 | Negative reaction to lameness examination |
| 27 | Warmblood – Romanian Sport Horse | Leisure | 7  | 565 | 164 | Negative reaction to lameness examination |
| 28 | Warmblood – Romanian Sport Horse | Leisure | 9  | 615 | 162 | Score 2                                   |
| 29 | Warmblood – Romanian Sport Horse | Leisure | 11 | 528 | 156 | Score 3                                   |
| 30 | Warmblood-Lipizzaner             | Leisure | 6  | 576 | 162 | Negative reaction to lameness examination |
| 31 | Warmblood-Lipizzaner             | Leisure | 7  | 560 | 152 | Score 1                                   |
| 32 | Warmblood-Lipizzaner             | Leisure | 8  | 564 | 164 | Negative reaction to lameness examination |
| 33 | Warmblood – Romanian Sport Horse | Leisure | 6  | 536 | 160 | Negative reaction to lameness examination |
| 34 | Warmblood – Romanian Sport Horse | Leisure | 14 | 517 | 156 | Negative reaction to lameness examination |
| 35 | Warmblood – Romanian Sport Horse | Leisure | 14 | 540 | 159 | Score 1                                   |
| 36 | Warmblood – Romanian Sport Horse | Leisure | 11 | 545 | 162 | Score 2                                   |
| 37 | Warmblood – Romanian Sport Horse | Leisure | 5  | 535 | 164 | Negative reaction to lameness examination |
| 38 | Warmblood – Romanian Sport Horse | Leisure | 8  | 515 | 157 | Negative reaction to lameness examination |
| 39 | Warmblood – Romanian Sport Horse | Leisure | 4  | 524 | 158 | Score 1                                   |
| 40 | Warmblood-Lipizzaner             | Leisure | 5  | 562 | 162 | Negative reaction to lameness examination |
| 41 | Warmblood-Lipizzaner             | Leisure | 6  | 575 | 158 | Negative reaction to lameness examination |
| 42 | Warmblood-Oldenburg              | Leisure | 7  | 565 | 167 | Score 1                                   |
| 43 | Warmblood – Romanian Sport Horse | Leisure | 8  | 535 | 159 | Negative reaction to lameness examination |
| 44 | Warmblood-Oldenburg              | Leisure | 6  | 541 | 161 | Negative reaction to lameness examination |
| 45 | Warmblood-Lipizzaner             | Leisure | 7  | 575 | 164 | Negative reaction to lameness examination |

|    |                                  |               |    |     |     |                                           |
|----|----------------------------------|---------------|----|-----|-----|-------------------------------------------|
| 46 | Warmblood-Lipizzaner             | Leisure       | 8  | 556 | 162 | Score 2                                   |
| 47 | Warmblood – Romanian Sport Horse | Leisure       | 7  | 535 | 164 | Negative reaction to lameness examination |
| 48 | Warmblood – Romanian Sport Horse | Leisure       | 6  | 526 | 162 | Negative reaction to lameness examination |
| 49 | Warmblood-Lipizzaner             | Leisure       | 7  | 521 | 159 | Negative reaction to lameness examination |
| 50 | Warmblood-Lipizzaner             | Leisure       | 7  | 548 | 159 | Negative reaction to lameness examination |
| 51 | Warmblood-Lipizzaner             | Leisure       | 6  | 546 | 152 | Negative reaction to lameness examination |
| 52 | Warmblood-Oldenburg              | Leisure       | 5  | 568 | 158 | Negative reaction to lameness examination |
| 53 | Warmblood – Romanian Sport Horse | Cross-country | 5  | 535 | 164 | Score 2                                   |
| 54 | Warmblood – Romanian Sport Horse | Cross-country | 6  | 542 | 162 | Negative reaction to lameness examination |
| 55 | Warmblood-Lipizzaner             | Cross-country | 4  | 538 | 164 | Negative reaction to lameness examination |
| 56 | Warmblood-Lipizzaner             | Cross-country | 5  | 564 | 160 | Score 1                                   |
| 57 | Warmblood-Lipizzaner             | Cross-country | 7  | 524 | 158 | Negative reaction to lameness examination |
| 58 | Warmblood – Romanian Sport Horse | Cross-country | 6  | 534 | 163 | Negative reaction to lameness examination |
| 59 | Warmblood-Oldenburg              | Cross-country | 6  | 545 | 160 | Negative reaction to lameness examination |
| 60 | Warmblood-Oldenburg              | Cross-country | 8  | 564 | 168 | Score 2                                   |
| 61 | Warmblood – Romanian Sport Horse | Cross-country | 7  | 520 | 158 | Negative reaction to lameness examination |
| 62 | Warmblood – Romanian Sport Horse | Cross-country | 8  | 529 | 162 | Score 2                                   |
| 63 | Warmblood-Lipizzaner             | Cross-country | 9  | 542 | 161 | Negative reaction to lameness examination |
| 64 | Warmblood-Lipizzaner             | Cross-country | 9  | 545 | 158 | Negative reaction to lameness examination |
| 65 | Warmblood-Lipizzaner             | Cross-country | 12 | 562 | 154 | Score 2                                   |
| 66 | Warmblood-Oldenburg              | Cross-country | 11 | 550 | 168 | Score 1                                   |
| 67 | Warmblood-Oldenburg              | Cross-country | 6  | 524 | 162 | Negative reaction to lameness examination |
| 68 | Warmblood-Lipizzaner             | Cross-country | 8  | 541 | 158 | Negative reaction to lameness examination |
| 69 | Warmblood-Lipizzaner             | Cross-country | 5  | 563 | 165 | Negative reaction to lameness examination |
| 70 | Warmblood – Romanian Sport Horse | Cross-country | 9  | 517 | 158 | Negative reaction to lameness examination |

|    |                                  |               |    |     |     |                                           |
|----|----------------------------------|---------------|----|-----|-----|-------------------------------------------|
| 71 | Warmblood – Romanian Sport Horse | Cross-country | 7  | 528 | 162 | Negative reaction to lameness examination |
| 72 | Warmblood – Romanian Sport Horse | Cross-country | 8  | 532 | 158 | Score 1                                   |
| 73 | Warmblood-Oldenburg              | Cross-country | 8  | 534 | 162 | Negative reaction to lameness examination |
| 74 | Warmblood-Oldenburg              | Cross-country | 9  | 561 | 162 | Negative reaction to lameness examination |
| 75 | Warmblood-Oldenburg              | Cross-country | 4  | 526 | 164 | Negative reaction to lameness examination |
| 76 | Warmblood-Oldenburg              | Cross-country | 6  | 542 | 167 | Negative reaction to lameness examination |
| 77 | Warmblood – Romanian Sport Horse | Cross-country | 7  | 537 | 157 | Negative reaction to lameness examination |
| 78 | Warmblood – Romanian Sport Horse | Cross-country | 8  | 546 | 161 | Negative reaction to lameness examination |
| 79 | Warmblood – Romanian Sport Horse | Cross-country | 10 | 536 | 164 | Score 2                                   |
| 80 | Warmblood-Oldenburg              | Cross-country | 9  | 532 | 162 | Negative reaction to lameness examination |
| 81 | Warmblood – Romanian Sport Horse | Cross-country | 5  | 518 | 158 | Negative reaction to lameness examination |
| 82 | Warmblood-Lipizzaner             | Cross-country | 8  | 536 | 162 | Negative reaction to lameness examination |
| 83 | Warmblood-Lipizzaner             | Cross-country | 6  | 542 | 160 | Score 2                                   |
| 84 | Warmblood-Lipizzaner             | Cross-country | 7  | 545 | 162 | Negative reaction to lameness examination |
| 85 | Warmblood-Oldenburg              | Cross-country | 7  | 536 | 166 | Score 1                                   |
| 86 | Warmblood-Oldenburg              | Cross-country | 8  | 545 | 162 | Negative reaction to lameness examination |
| 87 | Warmblood-Oldenburg              | Cross-country | 9  | 552 | 167 | Score 1                                   |
